# Supplementary material for: Patient-reported tolerability of adverse events in phase 1 trials
Source: PubMed Central journal article supplement — ESMO Open. 2017 Jun 23;2(2):e000148. doi: 10.1136/esmoopen-2016-000148 (PMC5519806; doi:10.1136/esmoopen-2016-000148), 2017-06-23
Supplement: esmoopen-2016-000148supp001.pdf [file esmoopen-2016-000148supp001.pdf]

## Patients' questionnaire

**1) How long would you tolerate fatigue?** (What is the minimal duration for which you would consider that this toxicity becomes non tolerable?)

*Mark only one response per row; ADL abbreviation stands for Activities of Daily Living*

|                                                                                  | 1-7 days                 | > 7 days                 |
|----------------------------------------------------------------------------------|--------------------------|--------------------------|
| Mild (Fatigue relieved by rest)                                                  | <input type="checkbox"/> | <input type="checkbox"/> |
| Moderate (Fatigue not relieved by rest; limiting instrumental ADL <sup>1</sup> ) | <input type="checkbox"/> | <input type="checkbox"/> |
| Severe (Fatigue not relieved by rest, limiting self-care ADL <sup>2</sup> )      | <input type="checkbox"/> | <input type="checkbox"/> |

1) Instrumental ADL refer to preparing meals, shopping for groceries or clothes, using the telephone, managing money, etc.

2) Self-care ADL refer to bathing, dressing and undressing, feeding self, using the toilet, taking medications, and not bedridden.

**2) How long would you tolerate fever?**

*Mark only one response per row.*

|                                                             | 1-7 days                 | > 7 days                 |
|-------------------------------------------------------------|--------------------------|--------------------------|
| Mild (38.0 - 39.0 degrees C (100.4 - 102.2 degrees F))      | <input type="checkbox"/> | <input type="checkbox"/> |
| Moderate (>39.0 - 40.0 degrees C (102.3 - 104.0 degrees F)) | <input type="checkbox"/> | <input type="checkbox"/> |
| Severe (>40.0 degrees C (>104.0 degrees F))                 | <input type="checkbox"/> | <input type="checkbox"/> |

**3) How long would you tolerate nausea?**

*Mark only one response per row.*

|                                                                  | 1-7 days                 | > 7 days                 |
|------------------------------------------------------------------|--------------------------|--------------------------|
| Mild (Loss of appetite without alteration in eating habits)      | <input type="checkbox"/> | <input type="checkbox"/> |
| Moderate (Oral intake decreased without significant weight loss) | <input type="checkbox"/> | <input type="checkbox"/> |
| Severe (Oral intake decreased with significant weight loss)      | <input type="checkbox"/> | <input type="checkbox"/> |

**4) How long would you tolerate vomiting?**

*Mark only one response per row.*

|                                       | 1-7 days                 | > 7 days                 |
|---------------------------------------|--------------------------|--------------------------|
| Mild (1 - 2 episodes in 24 hours)     | <input type="checkbox"/> | <input type="checkbox"/> |
| Moderate (3 - 5 episodes in 24 hours) | <input type="checkbox"/> | <input type="checkbox"/> |
| Severe (>=6 episodes in 24 hours)     | <input type="checkbox"/> | <input type="checkbox"/> |

**5) How long would you tolerate constipation?**

*Mark only one response per row.*

|                                                                        | 1-7 days                 | > 7 days                 |
|------------------------------------------------------------------------|--------------------------|--------------------------|
| Mild (Occasional or intermittent symptoms)                             | <input type="checkbox"/> | <input type="checkbox"/> |
| Moderate (Persistent symptoms with regular use of laxatives or enemas) | <input type="checkbox"/> | <input type="checkbox"/> |

|                                                                  |                          |                          |
|------------------------------------------------------------------|--------------------------|--------------------------|
| Severe (Resistant to laxatives and/or hospitalisation indicated) | <input type="checkbox"/> | <input type="checkbox"/> |
|------------------------------------------------------------------|--------------------------|--------------------------|

**6) How long would you tolerate diarrhea?**

*Mark only one response per row.*

|                                                                                       | 1-7 days                 | > 7 days                 |
|---------------------------------------------------------------------------------------|--------------------------|--------------------------|
| Mild (Increase of <4 stools per day over baseline)                                    | <input type="checkbox"/> | <input type="checkbox"/> |
| Moderate (Increase of 4 - 6 stools per day over baseline)                             | <input type="checkbox"/> | <input type="checkbox"/> |
| Severe (Increase of $\geq 7$ stools per day over baseline; hospitalization indicated) | <input type="checkbox"/> | <input type="checkbox"/> |

**7) How long would you tolerate anorexia?**

*Mark only one response per row.*

|                                                                                                                                              | 1-7 days                 | > 7 days                 |
|----------------------------------------------------------------------------------------------------------------------------------------------|--------------------------|--------------------------|
| Mild (Loss of appetite without alteration in eating habits)                                                                                  | <input type="checkbox"/> | <input type="checkbox"/> |
| Moderate (Loss of appetite with oral intake altered without significant weight loss or malnutrition; oral nutritional supplements indicated) | <input type="checkbox"/> | <input type="checkbox"/> |
| Severe (Loss of appetite associated with significant weight loss and/or tube feeding or total parenteral nutrition indicated)                | <input type="checkbox"/> | <input type="checkbox"/> |

**8) How long would you tolerate dizziness?**

*Mark only one response per row.*

|  | 1-7 days | > 7 days |
|--|----------|----------|
|  |          |          |

|                                                                                                    |                          |                          |
|----------------------------------------------------------------------------------------------------|--------------------------|--------------------------|
| Mild (Mild unsteadiness or sensation of movement)                                                  | <input type="checkbox"/> | <input type="checkbox"/> |
| Moderate (Moderate unsteadiness or sensation of movement; limiting instrumental ADL <sup>1</sup> ) | <input type="checkbox"/> | <input type="checkbox"/> |
| Severe (Severe unsteadiness or sensation of movement; limiting self-care ADL <sup>2</sup> )        | <input type="checkbox"/> | <input type="checkbox"/> |

1) Instrumental ADL refer to preparing meals, shopping for groceries or clothes, using the telephone, managing money, etc.

2) Self-care ADL refer to bathing, dressing and undressing, feeding self, using the toilet, taking medications, and not bedridden.

**9) How long would you tolerate being confused?**

*Mark only one response per row.*

|                                                                             | 1-7 days                 | > 7 days                 |
|-----------------------------------------------------------------------------|--------------------------|--------------------------|
| Mild (Mild disorientation)                                                  | <input type="checkbox"/> | <input type="checkbox"/> |
| Moderate (Moderate disorientation; limiting instrumental ADL <sup>1</sup> ) | <input type="checkbox"/> | <input type="checkbox"/> |
| Severe (Severe disorientation; limiting self-care ADL <sup>2</sup> )        | <input type="checkbox"/> | <input type="checkbox"/> |

1) Instrumental ADL refer to preparing meals, shopping for groceries or clothes, using the telephone, managing money, etc.

2) Self-care ADL refer to bathing, dressing and undressing, feeding self, using the toilet, taking medications, and not bedridden.

**10) How long would you tolerate having headaches?**

*Mark only one response per row.*

|  | 1-7 days | > 7 days |
|--|----------|----------|
|  |          |          |

|                                                                   |                          |                          |
|-------------------------------------------------------------------|--------------------------|--------------------------|
| Mild (Mild pain)                                                  | <input type="checkbox"/> | <input type="checkbox"/> |
| Moderate (Moderate pain; limiting instrumental ADL <sup>1</sup> ) | <input type="checkbox"/> | <input type="checkbox"/> |
| Severe (Severe pain; limiting self-care ADL <sup>2</sup> )        | <input type="checkbox"/> | <input type="checkbox"/> |

1) Instrumental ADL refer to preparing meals, shopping for groceries or clothes, using the telephone, managing money, etc.

2) Self-care ADL refer to bathing, dressing and undressing, feeding self, using the toilet, taking medications, and not bedridden.

**11) How long would you tolerate personality change?**

*Mark only one response per row.*

|                                        | 1-7 days                 | > 7 days                 |
|----------------------------------------|--------------------------|--------------------------|
| Mild (Mild personality change)         | <input type="checkbox"/> | <input type="checkbox"/> |
| Moderate (Moderate personality change) | <input type="checkbox"/> | <input type="checkbox"/> |
| Severe (Severe personality change)     | <input type="checkbox"/> | <input type="checkbox"/> |

**12) How long would you tolerate acneiform rash?**

*Mark only one response per row.*

|                                                                       | 1-7 days                 | > 7 days                 |
|-----------------------------------------------------------------------|--------------------------|--------------------------|
| Mild (Papules and/or pustules covering <10% of the body surface area) | <input type="checkbox"/> | <input type="checkbox"/> |

|                                                                                                                                                                                                                                |                          |                          |
|--------------------------------------------------------------------------------------------------------------------------------------------------------------------------------------------------------------------------------|--------------------------|--------------------------|
| Moderate (Papules and/or pustules covering 10 - 30% of the body surface area, associated with psychosocial impact (preventing from going out, seeing friends, or causing depression); limiting instrumental ADL <sup>1</sup> ) | <input type="checkbox"/> | <input type="checkbox"/> |
| Severe (Papules and/or pustules covering >30% of the body surface area, and/or associated with local superinfection with antibiotics indicated)                                                                                | <input type="checkbox"/> | <input type="checkbox"/> |

1) Instrumental ADL refer to preparing meals, shopping for groceries or clothes, using the telephone, managing money, etc.

**13) How long would you tolerate other skin rash?**

*Mark only one response per row.*

|                                                                                                                                                                                                                                | 1-7 days                 | > 7 days                 |
|--------------------------------------------------------------------------------------------------------------------------------------------------------------------------------------------------------------------------------|--------------------------|--------------------------|
| Mild (Papules and/or pustules covering <10% of the body surface area)                                                                                                                                                          | <input type="checkbox"/> | <input type="checkbox"/> |
| Moderate (Papules and/or pustules covering 10 - 30% of the body surface area, associated with psychosocial impact (preventing from going out, seeing friends, or causing depression); limiting instrumental ADL <sup>1</sup> ) | <input type="checkbox"/> | <input type="checkbox"/> |
| Severe (Papules and/or pustules covering >30% of the body surface area, and/or associated with local superinfection with antibiotics indicated)                                                                                | <input type="checkbox"/> | <input type="checkbox"/> |

1) Instrumental ADL refer to preparing meals, shopping for groceries or clothes, using the telephone, managing money, etc.

**14) How long would you tolerate shortness of breath?**

*Mark only one response per row.*

|                                                                                               | 1-7 days                 | > 7 days                 |
|-----------------------------------------------------------------------------------------------|--------------------------|--------------------------|
| Mild (Shortness of breath with moderate exertion)                                             | <input type="checkbox"/> | <input type="checkbox"/> |
| Moderate (Shortness of breath with minimal exertion; limiting instrumental ADL <sup>1</sup> ) | <input type="checkbox"/> | <input type="checkbox"/> |

|                                                                            |                          |                          |
|----------------------------------------------------------------------------|--------------------------|--------------------------|
| Severe (Shortness of breath at rest; limiting self-care ADL <sup>2</sup> ) | <input type="checkbox"/> | <input type="checkbox"/> |
|----------------------------------------------------------------------------|--------------------------|--------------------------|

1) Instrumental ADL refer to preparing meals, shopping for groceries or clothes, using the telephone, managing money, etc.

2) Self-care ADL refer to bathing, dressing and undressing, feeding self, using the toilet, taking medications, and not bedridden.

**15) How long would you tolerate having irregular heartbeats?**

*Mark only one response per row.*

|                                                                   | 1-7 days                 | > 7 days                 |
|-------------------------------------------------------------------|--------------------------|--------------------------|
| Mild (Causing no symptom)                                         | <input type="checkbox"/> | <input type="checkbox"/> |
| Moderate (Controlled by oral medication)                          | <input type="checkbox"/> | <input type="checkbox"/> |
| Severe (Hospitalization indicated and or/ intravenous medication) | <input type="checkbox"/> | <input type="checkbox"/> |

**16) How long would you tolerate other cardiac disorder?**

*Mark only one response per row.*

|                                                    | 1-7 days                 | > 7 days                 |
|----------------------------------------------------|--------------------------|--------------------------|
| Mild (Causing no symptom)                          | <input type="checkbox"/> | <input type="checkbox"/> |
| Moderate (Limiting instrumental ADL <sup>1</sup> ) | <input type="checkbox"/> | <input type="checkbox"/> |
| Severe (Limiting self-care ADL <sup>2</sup> )      | <input type="checkbox"/> | <input type="checkbox"/> |

1) Instrumental ADL refer to preparing meals, shopping for groceries or clothes, using the telephone, managing money, etc.

2) Self-care ADL refer to bathing, dressing and undressing, feeding self, using the toilet, taking medications, and not bedridden.

**17) How long would you tolerate hypertension?**

*Mark only one response per row.*

|                                                               | 1-7 days                 | > 7 days                 |
|---------------------------------------------------------------|--------------------------|--------------------------|
| Mild (No medication indicated)                                | <input type="checkbox"/> | <input type="checkbox"/> |
| Moderate (Oral therapy indicated)                             | <input type="checkbox"/> | <input type="checkbox"/> |
| Severe (Hospitalization and/or urgent intervention indicated) | <input type="checkbox"/> | <input type="checkbox"/> |

**18) How long would you tolerate hyperglycemia (elevated levels of glucose in the blood)?**

*Mark only one response per row.*

|                                                                                | 1-7 days                 | > 7 days                 |
|--------------------------------------------------------------------------------|--------------------------|--------------------------|
| Mild (Intervention not indicated or ambulatory medical intervention indicated) | <input type="checkbox"/> | <input type="checkbox"/> |
| Moderate (Hospitalization indicated)                                           | <input type="checkbox"/> | <input type="checkbox"/> |
| Severe (Life-threatening consequences)                                         | <input type="checkbox"/> | <input type="checkbox"/> |

**19) How long would you tolerate blurred vision?**

*Mark only one response per row.*

|                                   | 1-7 days                 | > 7 days                 |
|-----------------------------------|--------------------------|--------------------------|
| Mild (Intervention not indicated) | <input type="checkbox"/> | <input type="checkbox"/> |



|                                                                 |                          |                          |
|-----------------------------------------------------------------|--------------------------|--------------------------|
| Moderate (Symptomatic; limiting instrumental ADL <sup>1</sup> ) | <input type="checkbox"/> | <input type="checkbox"/> |
| Severe (Limiting self-care ADL <sup>2</sup> )                   | <input type="checkbox"/> | <input type="checkbox"/> |

1) Instrumental ADL refer to preparing meals, shopping for groceries or clothes, using the telephone, managing money, etc.

2) Self-care ADL refer to bathing, dressing and undressing, feeding self, using the toilet, taking medications, and not bedridden.

**20) How long would you tolerate having blood in the urines?**

*Mark only one response per row.*

|                                                                          | 1-7 days                 | > 7 days                 |
|--------------------------------------------------------------------------|--------------------------|--------------------------|
| Mild (no symptom; intervention not indicated)                            | <input type="checkbox"/> | <input type="checkbox"/> |
| Moderate (symptomatic; urinary catheter indicated)                       | <input type="checkbox"/> | <input type="checkbox"/> |
| Severe (transfusion, hospitalization or surgical intervention indicated) | <input type="checkbox"/> | <input type="checkbox"/> |

**21) How long would you tolerate hearing impairment?**

*Mark only one response per row.*

|                                                                               | 1-7 days                 | > 7 days                 |
|-------------------------------------------------------------------------------|--------------------------|--------------------------|
| Mild (Mild hearing impaired)                                                  | <input type="checkbox"/> | <input type="checkbox"/> |
| Moderate (Moderate hearing impaired, limiting instrumental ADL <sup>1</sup> ) | <input type="checkbox"/> | <input type="checkbox"/> |
| Severe (Severe hearing impaired, limiting self-care ADL <sup>2</sup> )        | <input type="checkbox"/> | <input type="checkbox"/> |

1) Instrumental ADL refer to preparing meals, shopping for groceries or clothes, using the telephone, managing money, etc.

2) Self-care ADL refer to bathing, dressing and undressing, feeding self, using the toilet, taking medications, and not bedridden.

**22) How long would you tolerate dry mouth?**

*Mark only one response per row.*

|                                                                                                                        | 1-7 days                 | > 7 days                 |
|------------------------------------------------------------------------------------------------------------------------|--------------------------|--------------------------|
| Mild (Mild symptoms; dry or thick saliva)                                                                              | <input type="checkbox"/> | <input type="checkbox"/> |
| Moderate (Moderate symptoms; oral intake alterations, copious water and/or other lubricants indicated)                 | <input type="checkbox"/> | <input type="checkbox"/> |
| Severe (Severe symptoms; inability to adequately aliment orally; tube feeding or total parenteral nutrition indicated) | <input type="checkbox"/> | <input type="checkbox"/> |

**23) How long would you tolerate weakness in hands/fingers (Peripheral motor neuropathy)?**

*Mark only one response per row.*

|                                                                                                    | 1-7 days                 | > 7 days                 |
|----------------------------------------------------------------------------------------------------|--------------------------|--------------------------|
| Mild (No symptom, weakness in limb or abolition of osteotendinous reflexes made by your clinician) | <input type="checkbox"/> | <input type="checkbox"/> |
| Moderate (Moderate symptoms; limiting instrumental ADL <sup>1</sup> )                              | <input type="checkbox"/> | <input type="checkbox"/> |
| Severe (Severe symptoms; limiting self-care ADL <sup>2</sup> )                                     | <input type="checkbox"/> | <input type="checkbox"/> |

1) Instrumental ADL refer to preparing meals, shopping for groceries or clothes, using the telephone, managing money, etc.

2) Self-care ADL refer to bathing, dressing and undressing, feeding self, using the toilet, taking medications, and not bedridden.
